# Supplementary material for: Hydrogen isotope fractionation is controlled by CO2 in coccolithophore lipids
Source: PubMed Central journal article supplement — Proc Natl Acad Sci U S A. 2024 Jun 21;121(26):e2318570121. doi: 10.1073/pnas.2318570121 (PMC11214045; doi:10.1073/pnas.2318570121), 2024-06-21
Supplement: pnas.2318570121.sapp.pdf [file pnas.2318570121.sapp.pdf]

## Supporting Information for

## Hydrogen isotope fractionation is controlled by CO<sub>2</sub> in coccolithophore lipids

Ismael Torres-Romero<sup>1\*†</sup>, Hongrui Zhang<sup>1\*†</sup>, Reto S. Wijker<sup>1</sup>, Alexander J. Clark<sup>1</sup>, Rachel E. McLeod<sup>1</sup>,  
Madalina Jaggi<sup>1</sup>, Heather M. Stoll<sup>1</sup>

<sup>1</sup>Climate Geology, Department of Earth Sciences, ETH Zürich, Sonneggstrasse 5, 8092 Zurich, Switzerland

† These two authors contributed equally to this work.

\*Corresponding authors: Ismael Torres-Romero and Hongrui Zhang

**Email:** ismael.torres@erdw.ethz.ch, zhh@ethz.ch

### This PDF file includes:

- SI Materials and Methods
- Supplementary Figures S1 to S11
- Supplementary Tables S1 to S5
- Legend for Dataset S1
- SI References

### Other supporting materials for this manuscript include the following:

- Dataset S1

## 31 SI Materials and methods

### 32 1. Laboratory measurements

#### 33 1.1. Cell concentration, size and growth rate.

34 After thorough resuspension of the photobioreactor vessel, 1 mL of culture was harvested at least once per  
35 day for cell growth monitoring at the same hour. A Multisizer 4e particle counter and sizer (Beckman  
36 Coulter) measured cell concentration and mean cell diameter. Growth rate ( $\mu$ ) was measured from cell  
37 concentrations in intervals of 24 h to account for entire day/night cycles. In turbidostat,  $\mu$  equals dilution  
38 rate (D) and was calculated by the following equations:

39

$$40 \mu = D + \frac{\ln X_1 - \ln X_0}{t_1 - t_0} \quad (1)$$

41

$$42 D = \frac{V_O + V_H}{V_{PBR}(t_1 - t_0)} \quad (2)$$

43

44 where  $X_0$  is cell concentration at time 0 ( $t_0$ ),  $X_1$  is cell concentration at time 1 day ( $t_1$ ),  $V_0$  is outflow volume,  
45  $V_H$  is harvested volume, and  $V_{PBR}$  is the photobioreactor vessel liquid volume.

46

#### 47 1.2. Carbonate system and aeration.

48 Culture medium for photobioreactor experiments was K/2 (1) made with artificial seawater (ASW) (2)  
49 without Tris buffer and supplemented with  $\text{NaHCO}_3$  and HCl to yield an initial dissolved inorganic carbon  
50 (DIC) of 2 mM or 4 mM. Calculations of the carbonate system were based on pH and DIC, using the NBS  
51 scale, 35‰ salinity, 7  $\mu\text{M}$  phosphate and 0  $\mu\text{M}$  silicate, in the CO2SYS excel macro (3).

52 With an internal pH-probe integrating a temperature sensor (InPro 3253SG/120/PT1000, Mettler  
53 Toledo), pH was continuously monitored and checked externally for harvested samples with a pH-meter  
54 (FiveEasy, Mettler Toledo) calibrated with NIST buffer standards (Mettler Toledo).

55 Concentrations of DIC were measured during cell harvesting and at least once the day before. After  
56 external pH measurement, cells were spun down and culture seawater supernatant was analyzed for DIC.  
57 In duplicate, 3.5 mL were measured with an Apollo SciTech DIC-C13 Analyzer coupled to a Picarro CO<sub>2</sub>  
58 analyzer calibrated with Dickson standard #186 and in-house  $\text{NaHCO}_3$  aqueous solutions of known  
59 concentrations. The Apollo-Picarro instrument had an analytical error of 10  $\mu\text{M}$  for DIC.

60 Photobioreactors and fresh media were pre-bubbled and bubbled throughout the experiment to achieve  
61 carbonate chemistry equilibrium. Gas CO<sub>2</sub> concentrations were measured with the Picarro CO<sub>2</sub> analyzer  
62 and corrected with certified gas mixtures of known ppm (PanGas and Air Liquide). Different air and CO<sub>2</sub>  
63 mixtures from 200 to 2000 ppm were bubbled into the photobioreactor system. To adjust CO<sub>2</sub>  
64 concentrations, first, our source of compressed air went through an NDC-140 CO<sub>2</sub> scrubber (F-DGSi) to  
65 obtain clean CO<sub>2</sub>-free air. Then this air was mixed with our in-house pure CO<sub>2</sub> bottle using a Gas Mixing  
66 System (GMS 150, Photon Systems Instruments). The flow was split and Mass Flow Controllers (Vögtlin  
67 Instruments) regulated the bubbling flow rate at 50 to 100 mL min<sup>-1</sup>.

68 Flow first entered the fresh media bottle prior to a gas filter (0.2  $\mu\text{m}$ ). The bottle was bubbled from the  
69 bottom to humidify the gas and equilibrate fresh media. Then gas collected at the bottle headspace went  
70 through a bubble-interrupting valve delimited by two additional filters whose role was to interrupt flow into  
71 the photobioreactor vessel for a few seconds every minute to avoid bubble interference during OD680  
72 readings. Gas was directed into a U-shaped sparger at the bottom of the vessel. Gas accumulating at the  
73 vessel headspace exited through the outflow tubing shared with the liquid outflow. Gas flow left the system  
74 from the outflow bottle headspace.

75

#### 76 1.3. Chlorophyll analysis.

77 About  $10^6$ - $10^7$  cells were harvested from photobioreactors in duplicate. Cells were pelleted at 4000 g for 5  
78 min and supernatant discarded before snap-freezing in  $N_2$  (l) and stored at  $-20^\circ C$ . Pellets were thoroughly  
79 resuspended in 1 mL pure methanol and transferred to 1.5 mL tubes. Pigment extraction was allowed for  
80 at least 1 h to overnight at  $-20^\circ C$ . Tubes were centrifuged for 5 min at 11000 g and supernatants were  
81 transferred into polystyrene cuvettes for spectrophotometer readings at 470, 652.4, 665.2 and 750 nm. The  
82 following empirical formula was used to quantify chlorophyll (4):  
83

$$84 \quad \text{Chlorophyll} \left( \frac{\mu g}{mL} \right) = 19.71(Abs_{652.4} - Abs_{750}) + 4.44(Abs_{665.2} - Abs_{750}) \quad (3)$$

85

#### 86 **1.4. Elemental analysis (EA) of particulate organic carbon and nitrogen (POC and PON).**

87 In precombusted quartz fiber filters (QM-A, Whatman), 50 mL of cultures were filtered and snap-frozen in  
88  $N_2$  (l). With an acid-base reaction, the inorganic carbon from samples was removed by converting  $CaCO_3$   
89 into  $CO_2$  (g). This was achieved by placing the filters inside a desiccator and exposing them to acid fumes  
90 issued from 50 mL of a 6%  $H_2SO_3$  solution. A vacuum pump was stopped below 20 mbar to evaporate the  
91 acid, and the desiccator was closed to allow acid vapors to react for at least 24 h before reopening it, which  
92 changed pigment color. Filters were further dried overnight at  $60^\circ C$ , compacted with a press and wrapped  
93 into tin cups with a pair of tweezers. Wrapped filter pellets were combusted in a ThermoFisher Flash-EA  
94 1112 coupled with a ConFlo IV interface to a ThermoFisher Delta V-IRMS, and carbon and nitrogen  
95 concentrations were quantified against known standards.  
96

#### 97 **1.5. Particulate inorganic carbon (PIC) determination.**

98 In polycarbonate membranes (Whatman Cyclopore), 20 mL of culture were filtered in triplicate. The  
99 seawater flowthrough was discarded and the cells on the filter were further washed with MQ-water before  
100 storing at  $-20^\circ C$ . Calcite on membranes was dissolved immersing in 1 mL of 2%  $HNO_3$  and vortexing well.  
101 Filter and cell debris were spun down (11000 g, 2 min) and 400  $\mu L$  of clear supernatant containing the  
102 dissolved calcium ions were transferred into Teflon tubes for analysis by inductively coupled plasma mass  
103 spectrometry (Agilent 8800 ICP-QQQ-MS). PIC was calculated from the molar concentration of Ca as  
104  $CaCO_3$  per cell.  
105

#### 106 **1.6. Lipid extraction and derivatization.**

107 Cells from 100-200 mL of *G. oceanica* were harvested at least in duplicate in precombusted glass fiber  
108 filters, then snap-frozen and stored at  $-20^\circ C$ . The total lipid fraction was extracted and quantified using an  
109 isopropanol and methyl tert-butyl ether (MTBE) protocol (5). Filters were unfrozen by addition of 1 mL  
110 preheated isopropanol containing 0.01% butylated hydroxytoluene for protection against double bond  
111 oxidation. Pellets were homogenized by vortexing and sonication and immediately heated at  $85^\circ C$  for 10  
112 min to lyse cells and inactivate lipases. After cooling down to room temperature, 10  $\mu g$  of standard C27:0  
113 alkenone (14-heptacosanone), triacylglycerol C17:C17:C17 (TAG) and 5- $\alpha$ -cholestane (all Sigma) were  
114 added to account for extraction yield and lipid quantification. Three mL of MTBE were added before  
115 vortexing. Phase separation was possible by mixing with 1 mL water and centrifuging for 5 min at 3200 g.  
116 Upper organic phase free of cell debris and filter was transferred to a clean glass tube. Higher extraction  
117 yield was achieved by re-extracting with an additional 1 mL MTBE and pooling the organic phases. In a  
118 bath up to  $30^\circ C$  and under a gentle  $N_2$  (g) stream, organic solvents were evaporated. Lipids were  
119 redissolved in methanol/chloroform (1:2, v/v) and half of the sample was transferred into a vial and dried  
120 again to redissolve in hexane or toluene for GC analysis of alkenones.

121 The remaining half was evaporated as well and 2 mL of methanol with 5%  $H_2SO_4$  were added for lipid  
122 transmethylation. Conversion of acyl-lipids into fatty acid methyl esters (FAME) occurred in glass vials for  
123 at least 1h at  $85^\circ C$  ensuring they were leak-tight along the incubation. After cooling down, phase separation  
124 was obtained by adding 1 mL water 0.9% NaCl (w/v) and 500  $\mu L$  hexane, vortexing well and centrifuging  
125 for 5 min at 3200 g. The upper hexane phase was transferred into a GC vial without taking any acid.  
126

## 127 1.7. Lipid identification and quantification.

128 The alkenones and fatty acids extracted and derivatized from continuous cultures were analyzed by a gas  
129 chromatography (GC) equipped with a programmable temperature vaporization injector (PTV) and coupled  
130 to a flame ionization detector (FID). Samples were injected with a TriPlus RSH Autosampler in splitless  
131 mode. Helium gas with a flow rate of 1.5 ml min<sup>-1</sup> was used as the carrier gas. Chromatographic separation  
132 of alkenones was achieved with a 60 m x 0.25 mm capillary column (VF-200ms, 0.25 µm film thickness,  
133 Agilent) and a 5 m x 0.25 mm guard column (Agilent) with the following temperature program: 1 min at  
134 120°C and temperature gradient of 40°C min<sup>-1</sup> to 200°C, 5°C min<sup>-1</sup> to 300°C, then hold for 15 min, then to  
135 320°C with 10°C min<sup>-1</sup> and hold for 1 min. Chromatographic separation of FAMES was carried out with a  
136 30 m x 0.32 mm capillary column (Rtx-Wax, 0.5 µm film thickness, Restek) and the following GC program:  
137 2 min at 50°C and temperature gradient of 15°C min<sup>-1</sup> to 150°C, 6°C min<sup>-1</sup> to 240°C, then hold for 5 min.  
138 Peaks were identified by comparing retention times with an in-house alkenone standard in-house alkenone  
139 standard (provided by G. O'Neil (Western Washington University) and C. M. Reddy (Woods Hole  
140 Oceanographic Institution) and FAME standards (Marine oil FAME Mix, Restek #35066), respectively. Peak  
141 areas of unknown analytes were compared with that of an internal standard (C27:0 alkenone or C17:0  
142 FAME) that was added to the sample before lipid extraction.  
143

## 144 2. Statistical analysis.

145 In **Fig. 1**, for the 50 and 100 µE condition, CO<sub>2</sub> concentrations define only two endmembers. While we  
146 report the sensitivity to CO<sub>2</sub> using a simple linear regression model, we cannot rule out nonlinear (e.g.  
147 logarithmic or other) relationships between these endmembers. Prism version 10 was used to calculate  
148 multiple linear regression with least squares for **Table S1**. For **Fig. S5**, Pearson correlations coefficients  
149 and two-tailed *p*-values for every pair of variables were computed with Prism software.  
150

## 151 3. Numerical model.

152 The stable hydrogen isotope ratio of alkenones was modeled with the cellular flows and their associated H  
153 fractionations hypothesized in the Discussion section. MathWorks MATLAB version R2021b was used to  
154 develop the model and ordinary differential equation (ODE) solver 'ode15s', for simulations. All the  
155 metabolic fluxes taken into account are summarized in a model diagram (**Fig. 3A**) and defined in **Table S4**.

156 The model is built upon the fate of the hydrogen atoms from NADPH, intracellular water and alkenone  
157 precursors, all determining alkenone  $\alpha$ . The first assumption is that the only source of NADPH is  
158 ferredoxin:NADP<sup>+</sup> reductase (FNR) enzyme transferring the electrons from photosystem I to NADPH (light-  
159 dependent reaction) in the chloroplast, and that NADPH generation is the most significant isotope  
160 fractionation step. Other sources such as the oxidative pentose phosphate pathway (oxPPP) or the citric  
161 acid cycle (TCA) in cytosol and transport of hydrogen through the chloroplast membrane via a malate (or a  
162 C3 or C4) shuttle are not simulated in this model.

### 163 3.1. Generation of NADPH

164 The generation rate of NADPH in the chloroplast is driven by the following equations:  
165

$$166 F_1 = V_{max,1} \frac{hv}{K_{M1,light} + hv} \frac{[NADP]}{K_{M1,NADP} + [NADP]} \quad (4)$$

$$167 V_{max,1} = k_{vmax,1} V_{max,CBB} \quad (5)$$

170 In Eq. 4, the first flux  $F_1$  is described as a Michaelis-Menten equation where  $V_{max}$  is the maximum velocity  
171 at saturating substrate concentrations and the  $K_M$  are the Michaelis constants or the substrate  
172 concentrations at which the reaction velocity is half of the  $V_{max}$ . The  $hv$  is the light intensity with a unit of  
173 µE. To emulate natural conditions, in our culture setup the light follows a sinusoidal curve during the  
174 photoperiod (**Fig. S3**). To simplify our simulation, here all  $hv$  are set to the daily maximum values in our

175 model. The [NADP] is the concentration of NADP<sup>+</sup>, which can be calculated as Pool<sub>N</sub> – [NADPH] –  
 176 [NADPD]. [NADPH] and [NADPD] are the concentrations of NADPH and NADPD (the accepted <sup>1</sup>H is  
 177 replaced by <sup>2</sup>H).

178 In our model, all V<sub>max</sub> of NADPH-related process are anchored with maximum reaction rate of CBB using a  
 179 constant, k, such as the k<sub>vmax,1</sub> in Eq. 5. The constant k is fitted using the measured hydrogen isotope data.  
 180 In theory, the fluxes of a Michaelis-Menten process can be tuned by both V<sub>max</sub> and K<sub>M</sub>. Neither the V<sub>max</sub> or  
 181 K<sub>M</sub> in the NADPH-related reactions can be found in literature. Thus, to reduce the degrees of freedom of  
 182 our model and achieve a higher efficiency in parameter fitting, the K<sub>M</sub> is set as the maximum NADPH/NADP  
 183 concentration in chloroplast, considering the NADP amount is the main limitation in high light environment.  
 184 Similar settings can also be found in the calculation of NADPH exchange and NADPH consumption in  
 185 carbon fixation (**Table S5**).

186 Then, the generation rate of NADPD can be calculated from the total flux of NADPH considering percentage  
 187 of deuterium in water and isotopic fractionation:  
 188

$$F_{1D} = F_1 \frac{p_{W,x}}{2} \alpha_{N-W,1} \quad (6)$$

189  
 190 In Eq. 6, p<sub>W,x</sub> is the fraction of HDO in all water molecules in the chloroplast compartment (subindex x) and  
 191 the  $\frac{p_{W,x}}{2}$  is the fraction of deuterium in all hydrogen atoms. All the parameter descriptions are compiled in  
 192 **Table S5**.

193 Similarly, the generation rate of NADPH (pure NADPH without any deuterium) can be calculated based on  
 194 mass balance as follows:  
 195

$$F_{1H} = F_1 - F_{1D} \quad (7)$$

196

### 197 3.2. Exchange of hydrogen between NADPH and water

200 The second flux F<sub>2</sub> illustrates the hydrogen exchange between NADPH and water in a reaction catalyzed  
 201 by enzymes such as glutathione reductase (GR). This process follows also a Michaelis-Menten kinetics,  
 202 the rate of which depends on the enzyme GR concentration and turnover rate (V<sub>max,2</sub>), the substrates  
 203 concentrations and their half-saturation concentration (K<sub>M,2</sub>). The function of GR is to maintain the cellular  
 204 redox balance by catalyzing the reduction of oxidized glutathione (GSSG) to its reduced form (GSH) using  
 205 NADPH as a cofactor. This process helps to protect cells from oxidative stress by scavenging reactive  
 206 oxygen species (ROS) and maintaining the antioxidant capacity of the cell, particularly at high light to avoid  
 207 light-induced damage (6). Thus, light intensity would trigger the cell to upregulate (1) GR expression and/or  
 208 (2) its activity by increasing the production rate of NADPH. Both of these two effects would result in a faster  
 209 exchange between NADPH and water, and thereby a smaller fractionation between water and alkenone.  
 210 Here, to reduce the degrees of freedom of the model, we combine these two effects into the NADPH  
 211 producing, and assume the exchanging between water and NADPH + NADPD is always in balance. Thus,  
 212 the hydrogen flux from water to NADPH(D) (F<sub>2,W2N</sub>) is equal with flux from NADPH(D) to water (F<sub>2,N2W</sub>):  
 213

$$F_2 = F_{2,N2W} = F_{2,W2N} = V_{max,2} \frac{[NADPH] + [NADPD]}{K_{M,2} + [NADPH] + [NADPD]} \quad (8)$$

214  
 215 Similar to the quantification of NADPH and NADPD fluxes in Section 3.1, the exchanging fluxes of two  
 216 isotopes can be calculated by the following equations:  
 217  
 218

$$F_{2D,N2W} = F_2 \frac{[NADPD]}{[NADPH] + [NADPD]} \alpha_{W-N,2} \quad (9)$$

219

$$F_{2H,N2W} = F_2 - F_{2D,N2W} \quad (10)$$

220

$$F_{2H,W2N} = F_2 \frac{p_{W,x}}{2} \alpha_{N-W,2} \quad (11)$$

221

222

223

224

225  $F_{2H,W2N} = F_2 - F_{2D,W2N}$  (12)  
 226

227 **3.3. Consumption of NADPH in carbon fixation and lipid synthesis**

228 The third flux  $F_3$  is the carbon fixation via the Calvin-Benson-Bassham (CBB) cycle in the chloroplast.  
 229 This step is controlled by the  $CO_2(aq)$  at the rubisco site, i.e. the chloroplast,  $[CO_{2x}]$ , and consumes NADPH:  
 230

231 
$$F_3 = V_{max,3} \frac{[CO_{2x}]}{K_{M,3} + [CO_{2x}]}$$
 (13)  
 232

233 In Eq. 13,  $[CO_{2x}]$  can be estimated by the  $[CO_{2sw}]$ ,  $CO_2(aq)$  of seawater, and a carbon concentrating  
 234 mechanism (CCM) factor:  $[CO_{2x}] = k_{CCM} [CO_{2sw}]$ . The  $V_{max,3}$  can be calculated by the rubisco amount and  
 235 turnover rate of rubisco at a temperature  $T$ .  
 236

237 
$$V_{max,3} = N_{Rubisco} k_{cat\_Rubisco}$$
 (14)  
 238

239 There is a significant temperature effect on growth rate of coccolithophore. Here we assume this  
 240 temperature effect plays a role in H isotope fractionation by controlling rubisco turnover rate,  $k_{cat\_Rubisco}$ ,  
 241 which can be described as:  
 242

243 
$$k_{cat\_Rubisco} = 2.67 \left( k_T (T - T_{opt})^2 + 1 \right)$$
 (15)  
 244

245 In Eq. 15, the  $2.67 \text{ s}^{-1}$  is the turnover rate of rubisco at optimal temperature ( $T_{opt}$ ) for coccolithophore growth  
 246 (7).  
 247

248 Similarly, the fluxes of NADPH with two different isotopes can be calculated separately:

249 
$$F_{3D} = F_3 \frac{[NADPD]}{[NADPH] + [NADPD]} \alpha_{N-C,3}$$
 (16)  
 250

251 
$$F_{3H} = F_3 - F_{3D}$$
 (17)  
 252

253 The fourth flux is the lipid synthesis by the fatty acid synthetase (FAS) system. Here we assume alkenones  
 254 are produced in two phases: an initial phase in the chloroplast where NADPH and the CBB metabolites  
 255 produce C16 fatty acids ( $F_4$ ), and a later phase in the cytoplasm where the C16 fatty acid is exported outside  
 256 the chloroplast and is further elongated by the same FAS enzymes and same substrates up to a C37  
 257 alkenone ( $F_4'$ ). This presumes at least half of the hydrogens in alkenones are from outside the chloroplast.  
 258

259 
$$F_4 = F_3 R_{C16-CBB}$$
 (18)  
 260

261 
$$F_{4D} = F_4 \frac{[NADPD]}{[NADPH] + [NADPD]} \alpha_{N-L,4}$$
 (19)  
 262

263 
$$F_{4H} = F_4 - F_{4D}$$
 (20)  
 264

265 
$$F_{4'} = F_4 R_{C37-C16}$$
 (21)  
 266

267 
$$F_{4'D} = F_{4'} \frac{[NADPD]}{[NADPH] + [NADPD]} \alpha_{N-L,4}$$
 (22)  
 268

269 
$$F_{4'H} = F_{4'} - F_{4'D}$$
 (23)  
 270

271 The fifth flux  $F_5$  describes the water exchange rate in the chloroplast and can be calculated from the water  
 272 amount in the chloroplast  $W_x$  and water residence time  $\tau_{W,x}$ :

273  
274  
275  
276  
277  
278  
279  
280  
281  
282

$$F_{5,in} = \frac{W_x}{\tau_{W,x}} \quad (24)$$

$$F_{5,out} = F_{5,in} - F_1 - R_{W-CBB}F_3 - R_{W-C16}F_4 \quad (25)$$

$$F_{5D,in} = F_{5,in}p_{W,x} \quad (26)$$

$$F_{5D,out} = F_{5,out}p_{W,c} \quad (27)$$

In Eq. 27,  $p_{W,c}$  is the fraction of HDO in all water molecules in the cytoplasm (subindex c).

### 283 3.4. Ordinary differential equations (ODEs) for NADPH concentrations and water amount

284 The concentration of NADPH, NADPD and amount of HDO in chloroplast can be calculated by resolving  
285 the following ODEs:

$$\frac{d[NADPH]}{dt} = \frac{1}{vol} (F_{1H} + F_{2H,W2N} - F_{2H,N2W} - R_{N-CBB}F_{3H} - R_{N-C16}F_{4H}) \quad (28)$$

$$\frac{d[NADPD]}{dt} = \frac{1}{vol} (F_{1D} + F_{2D,W2N} - F_{2D,N2W} - R_{N-CBB}F_{3D} - R_{N-C16}F_{4D}) \quad (29)$$

$$\frac{dHDO_x}{dt} = -F_{1D} + F_{2D,N2W} - F_{2D,W2N} - R_{W-CBB}F_{3D} - R_{W-C16}F_{4D} + F_{5D,in} - F_{5D,out} \quad (30)$$

292 It should be noted here that the  $F_3$ ,  $F_4$  and  $F_4'$  are based on carbon fluxes and have a unit of mol C s<sup>-1</sup>. To  
293 calculate the hydrogen fluxes, the hydrogen ratios of NADPH-flux ( $R_{N-C3}$ ,  $R_{N-C16}$ ,  $R_{N-C37}$ ) and water-flux ( $R_{W-}$   
294  $CBB$ ,  $R_{W-C16}$ ) should be employed in equations 28-30. The volume of chloroplast,  $vol$ , can be calculated as  
295 proposed by McClelland et al. (2017) (8).  
296

### 297 3.5. Alkenone hydrogen isotope ratio

298 The hydrogen isotope of NADPH and water in chloroplast can be calculated as:

$$R_{NADPH,x} = \frac{[NADPD]}{[NADPH]} \quad (31)$$

$$R_{W,x} = \frac{HDO_x}{2 H_2O_x + HDO_x} \quad (32)$$

303 In Eq. 32,  $H_2O_x$  is the amount of water with only <sup>1</sup>H, and is calculated from the compartment volume as  
304 follows:  
305  
306

$$H_2O_x = 0.7 \frac{1000}{18} vol - HDO_x \quad (33)$$

308 where 0.7 is the proportion of the chloroplast volume occupied by water, 18 g mol<sup>-1</sup> is the molar mass of  
309 water and 1000 g L<sup>-1</sup> is the density of water.

311 Then, the isotope ratio of C3 can be determined from the hydrogen isotope of water and NADPH in  
312 chloroplast:  
313

$$R_{C3} = \frac{P_{C3,Nx} \frac{R_{N,x}}{1 + R_{N,x}} + P_{C3,Wx} \frac{R_{W,x}}{1 + R_{W,x}}}{1 - \left( P_{C3,Nx} \frac{R_{N,x}}{1 + R_{N,x}} + P_{C3,Wx} \frac{R_{W,x}}{1 + R_{W,x}} \right)} \quad (34)$$

314

315  
316 Similarly, the isotope ratio of C16 can be calculated from the mixing of C3, NADPH and water in chloroplast:  
317

$$318 \quad R_{C16} = \frac{P_{C16,C3} \frac{R_{C3}}{1+R_{C3}} + P_{C16,Nx} \frac{R_{N,x}}{1+R_{N,x}} + P_{C16,Wx} \frac{R_{W,x}}{1+R_{W,x}}}{1 - \left( P_{C16,C3} \frac{R_{C3}}{1+R_{C3}} + P_{C16,Nx} \frac{R_{N,x}}{1+R_{N,x}} + P_{C16,Wx} \frac{R_{W,x}}{1+R_{W,x}} \right)} \quad (35)$$

319  
320 Finally, isotope ratio of C37 can be calculated from the mixing of C16, NADPH and water in cytoplasm:  
321

$$322 \quad R_{C37} = \frac{P_{C37,C16} \frac{R_{C16}}{1+R_{C16}} + P_{C37,Nc} \frac{R_{N,c}}{1+R_{N,c}} + P_{C37,Wc} \frac{R_{W,c}}{1+R_{W,c}}}{1 - \left( P_{C37,C16} \frac{R_{C16}}{1+R_{C16}} + P_{C37,Nc} \frac{R_{N,c}}{1+R_{N,c}} + P_{C37,Wc} \frac{R_{W,c}}{1+R_{W,c}} \right)} \quad (36)$$

323  
324 The  $\delta^2H_{C37}$  is calculated by:  
325

$$326 \quad \delta^2H_{C37} = \left( \frac{R_{C37}}{R_{VSMOW}} - 1 \right) \times 1000 \quad (37)$$

327  
328 And the fractionation of C37 and water,  $\alpha_{C37-W}$ , can be calculated by Eq. 4 as described above, which is the  
329 apparent alkenone hydrogen isotope fractionation measured in experiments ( $\alpha_{alkenone}$ ).

### 330 3.6. NADPH residence time in chloroplast

331 The key mechanism proposed in this work is the NADPH residence time in the chloroplast, which can be  
332 calculated as follows:

$$333 \quad \tau_{NADPH,x} = \frac{[NADPH_x]}{F_1 + F_2} \quad (38)$$

334  
335 where the  $[NADPH_x]$  is the concentration of NADPH in chloroplast (including both NADPH and NADPD).  
336 For mass balance, we have  $F_1 = F_3 + F_4$ . Thus, by combining the equation (5), (13), (18) and (21), the  
337  $[NADPH_x]$  can be calculated as following equation 39:  
338

$$339 \quad [NADPH_x] = \frac{V_{max,3} [CO_{2x}] K_{M1,NADP} (1 + R_{N-CBB} R_{C16-CBB})}{V_{max,1} (K_{M3,CO_2} + [CO_{2x}]) h\nu - V_{max,3} [CO_{2x}] (1 + R_{N-CBB} R_{C16-CBB}) (K_{M31,Light} + h\nu)} \quad (39)$$

340  
341 Combining the equation 38 and 39, we obtain:  
342

$$343 \quad \tau_{NADPH,x} = \frac{[NADPH_x]}{V_{max,1} \frac{h\nu}{K_{M1,Light} + h\nu} \frac{Pool_N - [NADPH_x]}{K_{M1,NADP} + Pool_N - [NADPH_x]} + V_{max,2} \frac{[NADPH_x]}{K_{M2} + [NADPH_x]}} \quad (40)$$

344  
345

### 346 3.7. Simulation caveats

347 It should be noted that the predictions of  $\alpha_{C37}$  at a given temperature, light and  $CO_2(aq)$  in this model did  
348 not match perfectly with the measurements (with Pearson linear correlation  $r = 0.75$ , **Fig. S11**). The  
349 difference between the simulation and measurements are mainly caused by four aspects:

350 (1) We employed a fixed CCM intensity, in which the chloroplast  $CO_2(aq)$  is always as 1.5 times of the  
351 culture media  $CO_2(aq)$ . The CCM intensity is not well constrained at present, but with help of alkenone  
352 carbon isotope fractionations, it would hopefully simulate better the CCM process in further works.

353 (2) The KIE in different reactions have been poorly studied so far. To simplify, we assumed that most of  
354 fractionations happen in the generation of NADPH.



355 (3) We did not simulate the NADPH generation in chloroplast by other pathways due to lack of information.  
356 Also, the NADPH can be exchanged between chloroplast and cytoplasm, which can change the NADPH<sub>x</sub>  
357 and NADPH<sub>c</sub> in the model.

358 (4) The water hydrogen isotope ratios in cytoplasm was fixed as same as seawater. If the cytoplasm water  
359 has a much long resident time (>100 s), there could be up to 20 ‰ isotopic shift, which might partly explain  
360 the difference between our simulations and measurements.

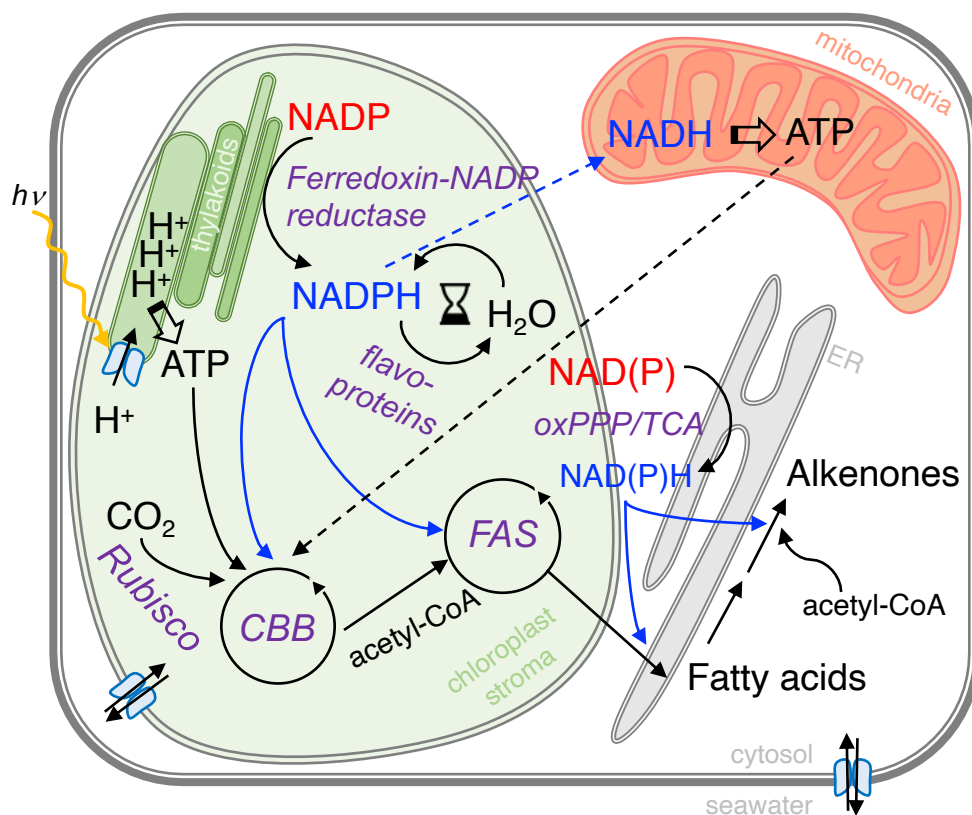

363 **Fig. S1. Cell model showing alkenone biosynthesis and the fluxes affecting H isotopic signature.**

364 The ferredoxin-NADP reductase introduces a  $\delta^2H$  in NADPH of -600‰ relative to the stromal water. This  
 365  $^2H$ -depleted H from NADPH exchanges with the intracellular  $^2H$ -enriched water via flavoproteins. Stromal  
 366 NADPH is mainly consumed by the Calvin-Benson-Bassham cycle (CBB) and the fatty acid synthetase  
 367 (FAS) complex, whose competition with flavoproteins determines NADPH residence time. The CBB  
 368 produces C3 compounds that can generate acetyl-CoA for fatty acid production by the FAS. These fatty  
 369 acids can be exported to the endoplasmic reticulum (ER) and cytosol for further elongation to produce  
 370 alkenones. Other sources of NAD(P)H introduce a less negative  $\delta^2H$  such as the oxidative Pentose  
 371 Phosphate Pathway (oxPPP) or the tricarboxylic acid cycle (TCA). The different  $H_2O$  channels and pumps  
 372 influence the water  $\delta^2H$  in each compartment. As biomass is depleted in deuterium, intracellular water is  
 373 enriched, especially in the stroma, where light-activated  $H^+$  pumps generating the  $H^+$  gradient fueling ATP  
 374 synthesis could further affect  $\delta^2H$  fractionation.

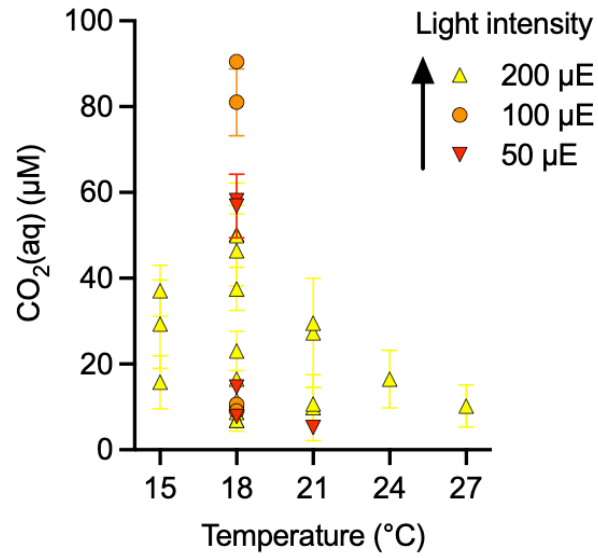

377

378 **Fig. S2. Matrix of growth conditions for *G. oceanica* continuous culture samples ( $N = 29$ ).**

379

380

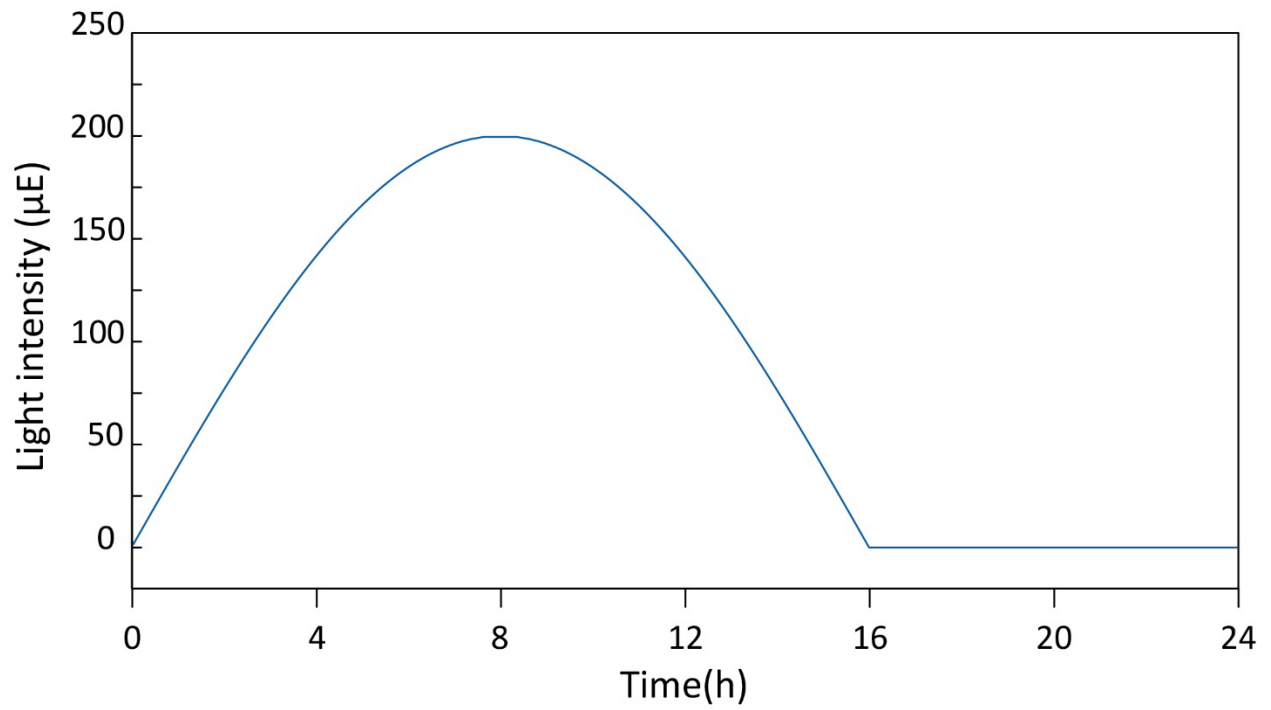

381

382 **Fig. S3. Variation of light intensity during a day-night cycle for 200  $\mu\text{E}$  experiments.**

383

384  
385

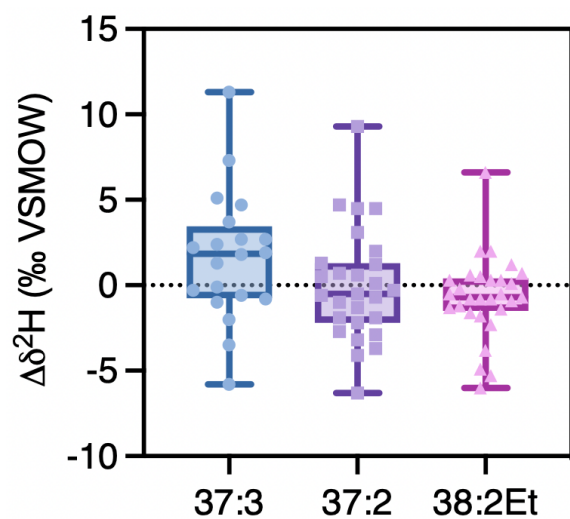

386  
387

388 **Fig. S4. Differences between  $\delta^2\text{H}$  of each individual alkenone from the weighted average of the three**  
389 **alkenones for that sample.** Boxplot shows the distribution of compound-specific  $\delta^2\text{H}$  variation for all the  
390 cultures ( $N = 29$ ) with overlaid datapoints representing each an average of technical replicates.

391  
392

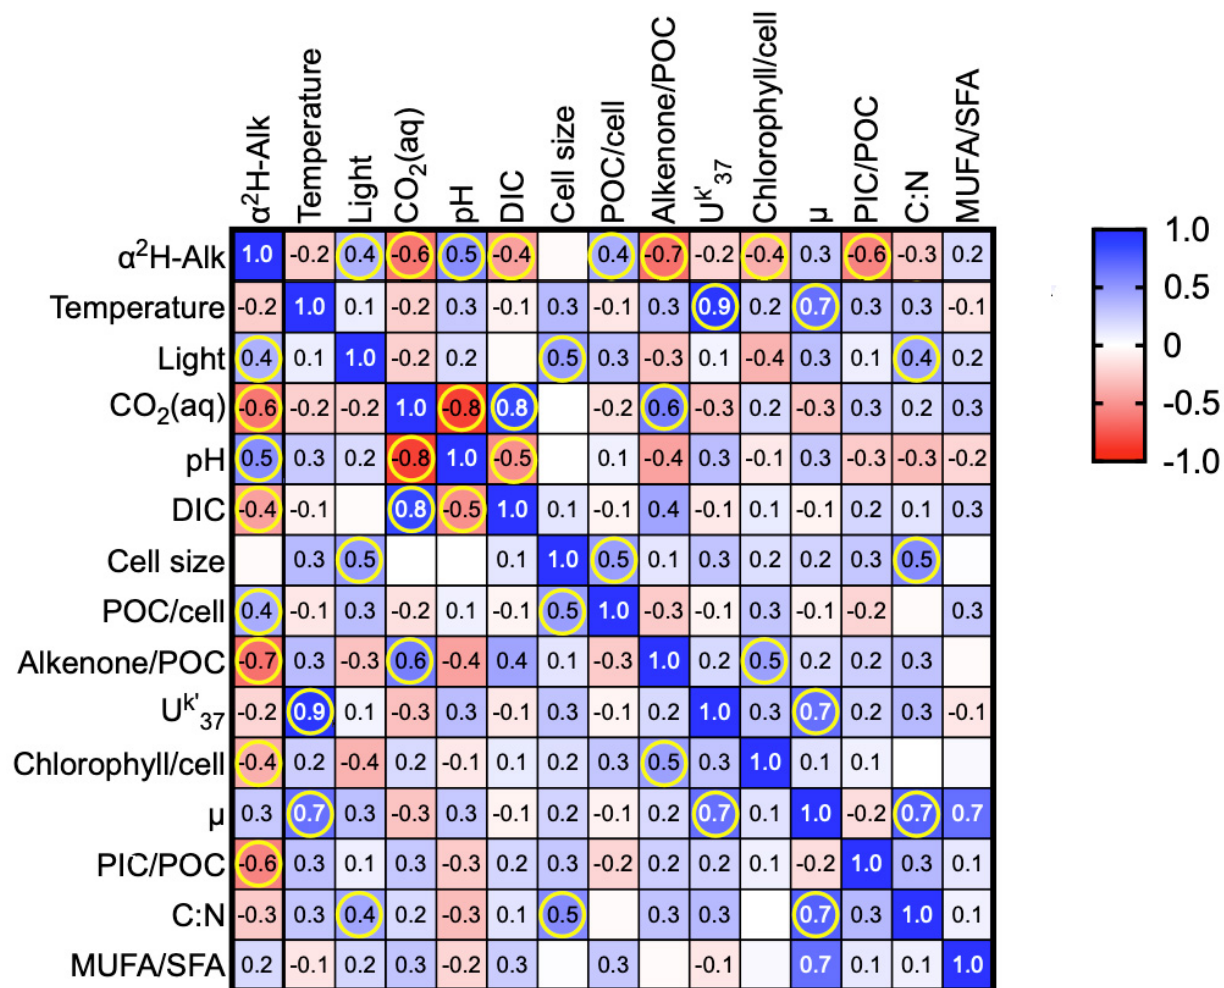

393  
 394  
 395 **Fig. S5. Heat map of the correlation matrix indicating Pearson correlation coefficients.** Pairs whose  
 396 two-tailed  $p$ -value is  $<0.05$  are highlighted in yellow circles. Abbreviations:  $\alpha^2\text{H-Alk}$ , hydrogen isotope  
 397 fractionation between alkenones and water; DIC, dissolved inorganic carbon; POC, particulate organic  
 398 carbon;  $\mu$ , growth rate; PIC, particulate inorganic carbon; C:N, carbon/nitrogen ratio; MUFA/SFA,  
 399 monounsaturated to saturated fatty acids ratio.

400

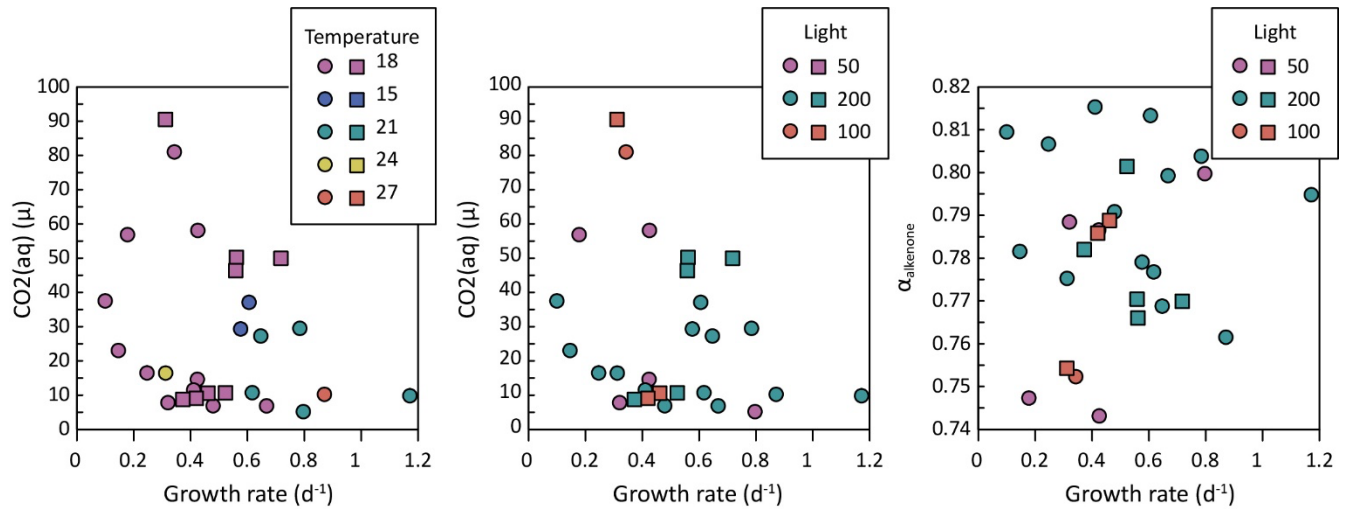

401  
402

403 **Fig. S6. Cross-plots between growth rate, CO<sub>2</sub>(aq) and alkenone hydrogen isotope fractionation (α<sub>alkenone</sub>)**  
404 **in this work.** Color code indicates temperature or light intensity. Circles represent growth rates estimated by  
405 optical density and squares represent those estimated by cell counting.

406

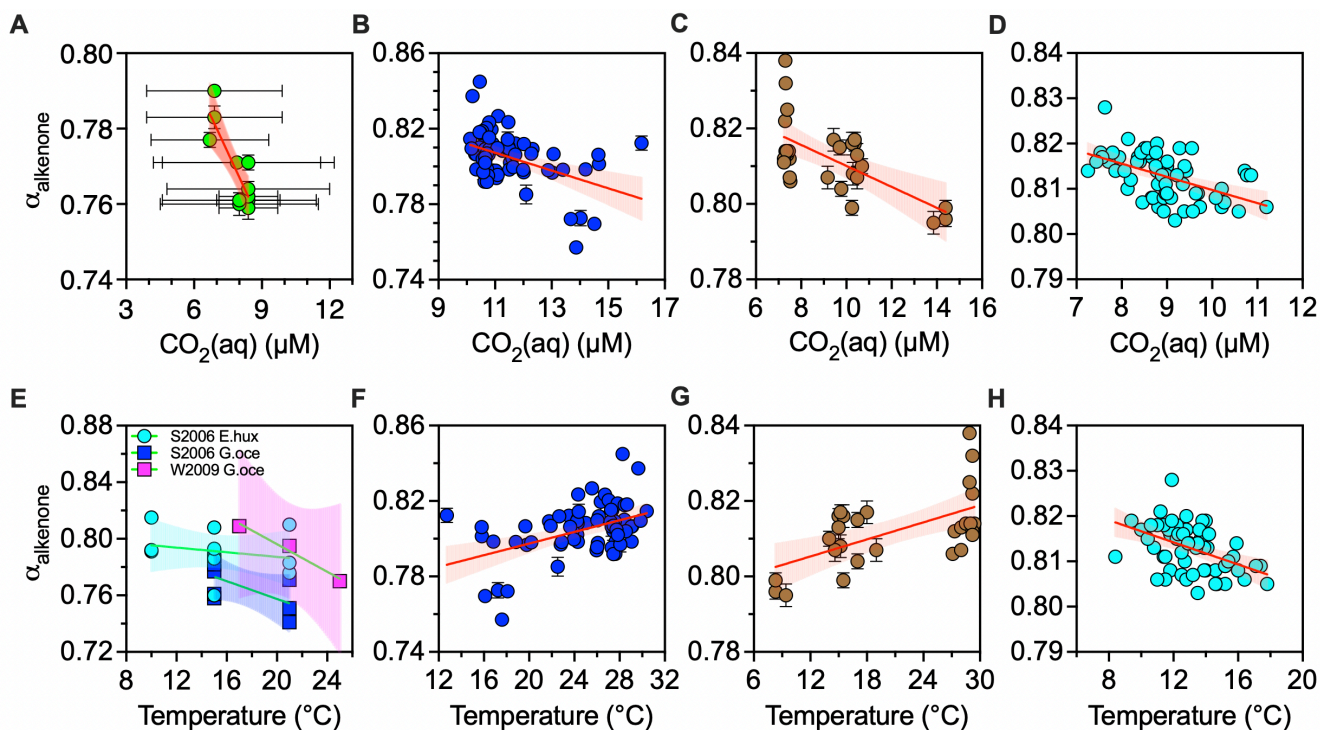

407  
 408  
 409  
 410  
 411  
 412  
 413  
 414  
 415

**Fig. S7. Slope regressions from previous cultures and environmental data used in Fig. 2.** (A-D) Alkenone  $\alpha$  in function of estimated  $\text{CO}_2(\text{aq})$  or (E-H) in function of temperature. (A) From Weiss et al. (2019) cultures (9) excluding Exp. 6. (E) S2006 *E. hux* are *E. huxleyi* cultures and S2006 *G. oce* are *G. oceanica* cultures from Schouten et al. (2006) (10), and W2009 *G. oce* are also *G. oceanica* cultures from Wolhowe et al. (2009) (11). (B, F) SPOM samples from Gould et al. (2019) (12). (C, G) Core-tope samples from Weiss et al. (2019) (13). (D, H) Glacial-interglacial samples from the Chile margin (14).



416

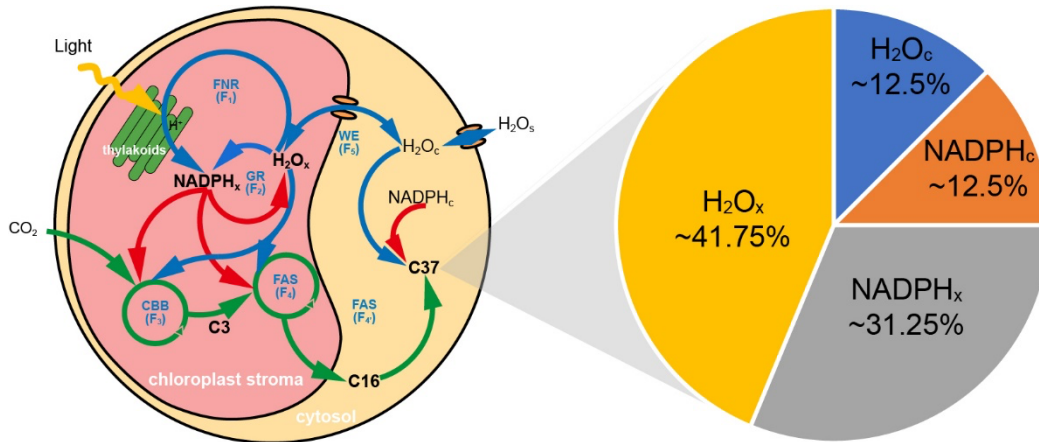

417

418 **Fig. S8. Proposed hydrogen source of alkenones as simulated in this study, detailed in Methods.**  
419 Left panel illustrates the main fluxes as labeled in Figure 3, and right panel indicates the relative  
420 contributions of H to the alkenones.

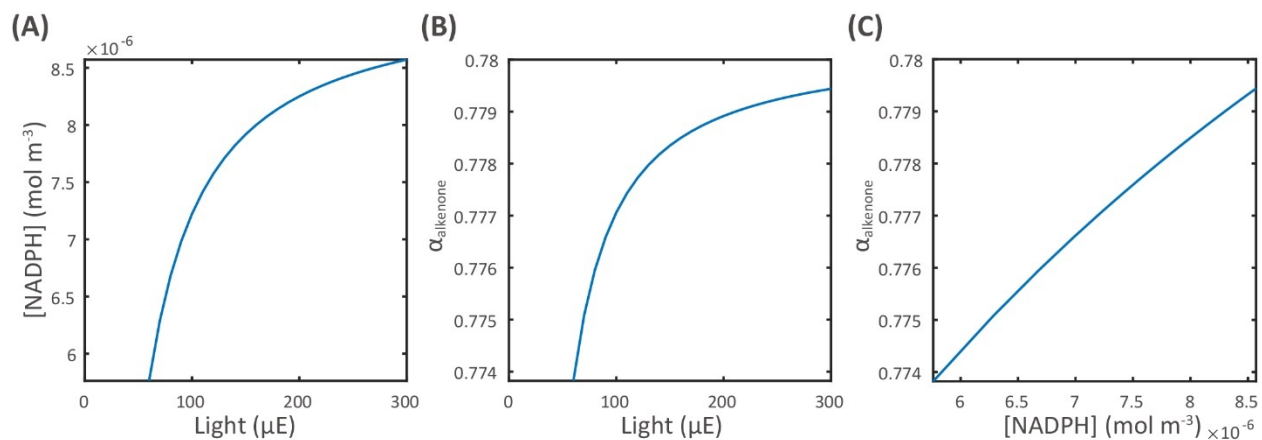

421  
422  
423  
424  
425  
426  
427  
428

**Fig. S9. Sensitivity tests of hydrogen isotope fractionation ( $\alpha_{\text{alkenone}}$ ) on light at  $20 \mu\text{M CO}_2(\text{aq})$ . (A)** The NADPH concentration in chloroplast increases at higher light intensities. **(B)** The  $\alpha_{\text{alkenone}}$  increases at higher light intensities. **(C)** The  $\alpha_{\text{alkenone}}$  increases with NADPH concentration.

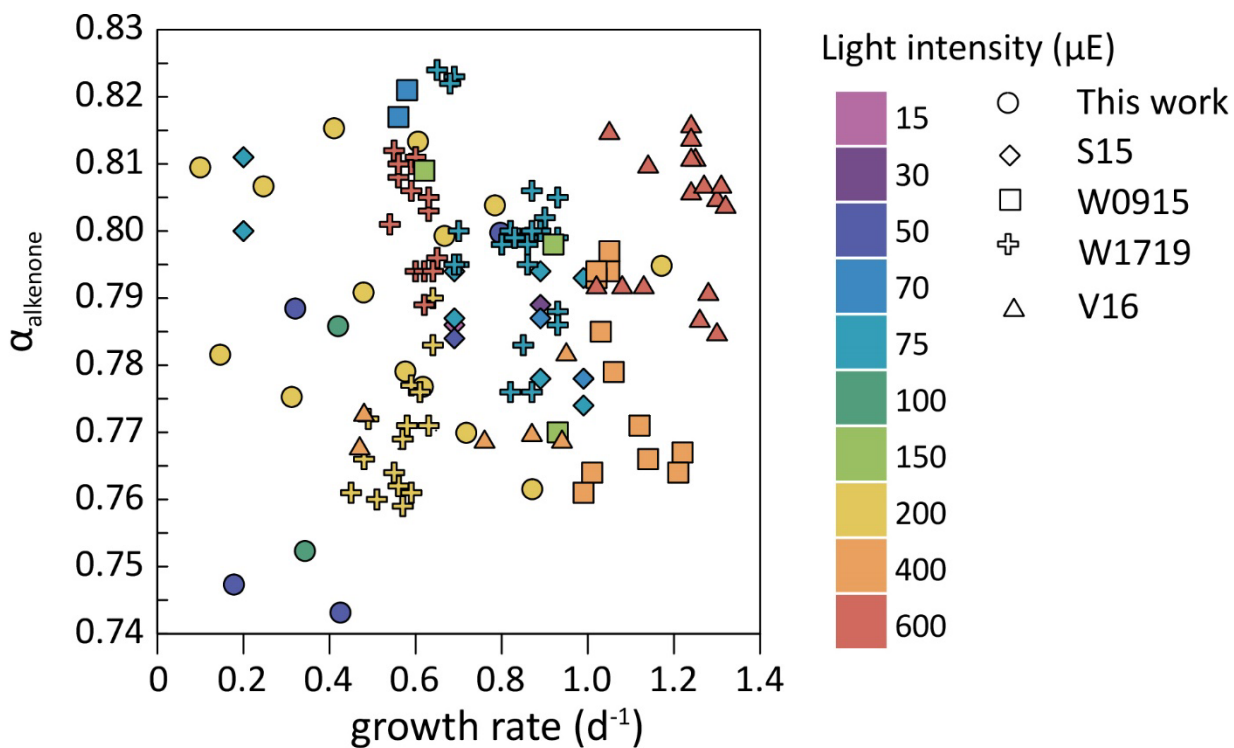

430

431 **Fig. S10. Cross-plot of growth rate and alkenone hydrogen isotope fractionation (α<sub>alkenone</sub>) in this**  
 432 **work and in other published datasets.** S15 represents Sachs and Kawaka, 2015 (15); W0915 represents  
 433 Wolhowe et al., 2009 and 2015 (11, 16); W1719 is Weiss et al., 2017 and 2019 (17, 9); V16 is van der Meer  
 434 et al., 2015 (18).

435

436

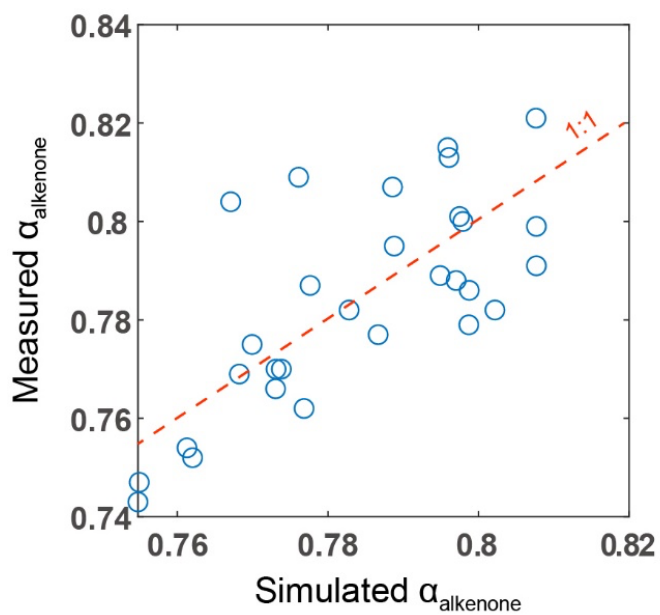

437

438 **Fig. S11. Comparison between simulated hydrogen isotope fractionation ( $\alpha_{\text{alkenone}}$ ) and**  
439 **measurements from laboratory cultures.**

440 **Supplementary Tables**441 **Table S1. Culture conditions in 29 experiments used in this study.**

| Experiment | Light ( $\mu\text{E}$ ) | Temperature ( $^{\circ}\text{C}$ ) | $[\text{CO}_2(\text{aq})]$ ( $\mu\text{M}$ ) | Experiment | Light ( $\mu\text{E}$ ) | Temperature ( $^{\circ}\text{C}$ ) | $[\text{CO}_2(\text{aq})]$ ( $\mu\text{M}$ ) |
|------------|-------------------------|------------------------------------|----------------------------------------------|------------|-------------------------|------------------------------------|----------------------------------------------|
| 1          | 50                      | 18                                 | 14.6                                         | 16         | 200                     | 21                                 | 27.3                                         |
| 2          | 100                     | 18                                 | 10.6                                         | 17         | 200                     | 24                                 | 16.4                                         |
| 3          | 100                     | 18                                 | 9.1                                          | 18         | 200                     | 27                                 | 10.2                                         |
| 4          | 200                     | 18                                 | 8.7                                          | 19         | 200                     | 18                                 | 16.5                                         |
| 5          | 200                     | 18                                 | 10.7                                         | 20         | 200                     | 18                                 | 37.5                                         |
| 6          | 200                     | 18                                 | 11.5                                         | 21         | 200                     | 18                                 | 6.9                                          |
| 7          | 50                      | 18                                 | 58.1                                         | 22         | 200                     | 15                                 | 37.1                                         |
| 8          | 50                      | 18                                 | 56.9                                         | 23         | 200                     | 15                                 | 15.7                                         |
| 9          | 100                     | 18                                 | 90.5                                         | 24         | 200                     | 21                                 | 9.8                                          |
| 10         | 100                     | 18                                 | 81                                           | 25         | 200                     | 21                                 | 29.5                                         |
| 11         | 200                     | 18                                 | 50.2                                         | 26         | 50                      | 21                                 | 5.2                                          |
| 12         | 200                     | 18                                 | 46.4                                         | 27         | 200                     | 21                                 | 10.7                                         |
| 13         | 200                     | 18                                 | 49.9                                         | 28         | 200                     | 18                                 | 6.9                                          |
| 14         | 200                     | 15                                 | 29.3                                         | 29         | 50                      | 18                                 | 7.8                                          |
| 15         | 200                     | 18                                 | 23                                           |            |                         |                                    |                                              |

442

443 **Table S2. Comparison of multiple linear regression results.** From #1 to #6, the MLR are carried out by  
 444 using the different combinations of parameters with a form of  $\alpha_{alkenone} = \sum_1^n (k_i \times x_i) + b$ , where k is the  
 445 slope of each parameter in the column of "estimate", x is the parameter and b is the intercept. It should be  
 446 noted that the combination #6 can best predict the  $\alpha_{alkenone}$ . However, these parameters describe the  
 447 coccolithophores response to the environmental drivers and, in this work, our target is linking the  
 448 environment variations with  $\alpha_{alkenone}$ . Thus, in the main text, we only discuss the #1 and #2, which give the  
 449 best prediction on how environmental variations drives  $\alpha_{alkenone}$ .  
 450

| MLR               | Parameters              | Estimate               | Standard Error        | P value | R <sup>2</sup>          |
|-------------------|-------------------------|------------------------|-----------------------|---------|-------------------------|
| $\alpha_{alk}$ #1 | Intercept               | 0.8526                 | 0.0223                | <0.0001 | <b>0.6153</b><br>(N=29) |
|                   | Temperature             | $-3.566 \cdot 10^{-3}$ | $1.074 \cdot 10^{-3}$ | 0.0028  |                         |
|                   | Light                   | $8.815 \cdot 10^{-5}$  | $4.326 \cdot 10^{-5}$ | 0.0523  |                         |
|                   | CO <sub>2</sub> (aq)    | $-6.017 \cdot 10^{-4}$ | $1.187 \cdot 10^{-4}$ | <0.0001 |                         |
| $\alpha_{alk}$ #2 | Intercept               | 0.8807                 | 0.02639               | <0.0001 | <b>0.5854</b><br>(N=29) |
|                   | Temperature             | $-3.714 \cdot 10^{-3}$ | $1.124 \cdot 10^{-3}$ | 0.0029  |                         |
|                   | Light                   | $1.258 \cdot 10^{-4}$  | $4.387 \cdot 10^{-5}$ | 0.0083  |                         |
|                   | log(CO <sub>2</sub> aq) | $-3.672 \cdot 10^{-2}$ | $7.819 \cdot 10^{-3}$ | <0.0001 |                         |
| $\alpha_{alk}$ #3 | Intercept               | 0.8668                 | 0.02249               | <0.0001 | 0.5496<br>(N=29)        |
|                   | Temperature             | $-3.480 \cdot 10^{-3}$ | $1.138 \cdot 10^{-3}$ | 0.0051  |                         |
|                   | CO <sub>2</sub> (aq)    | $-6.531 \cdot 10^{-4}$ | $1.228 \cdot 10^{-4}$ | <0.0001 |                         |
| $\alpha_{alk}$ #4 | Intercept               | 0.7844                 | 0.01016               | <0.0001 | 0.4453<br>(N=29)        |
|                   | Light                   | $8.366 \cdot 10^{-5}$  | $5.088 \cdot 10^{-5}$ | 0.1122  |                         |
|                   | CO <sub>2</sub> (aq)    | $-5.127 \cdot 10^{-4}$ | $1.362 \cdot 10^{-4}$ | 0.0009  |                         |
| $\alpha_{alk}$ #5 | Intercept               | 0.8061                 | 0.02835               | <0.0001 | 0.2209<br>(N=29)        |
|                   | Temperature             | $-2.355 \cdot 10^{-3}$ | $1.460 \cdot 10^{-3}$ | 0.1189  |                         |
|                   | Light                   | $-1.365 \cdot 10^{-4}$ | $5.889 \cdot 10^{-5}$ | 0.0286  |                         |
| $\alpha_{alk}$ #6 | Intercept               | 0.8206                 | 0.0076                | <0.0001 | <b>0.8459</b><br>(N=15) |
|                   | Alkenone/POC            | -0.5135                | 0.1462                | 0.0049  |                         |
|                   | PIC/POC                 | $-4.171 \cdot 10^{-2}$ | $1.163 \cdot 10^{-2}$ | 0.0043  |                         |
|                   | MUFA/SFA                | $3.032 \cdot 10^{-2}$  | $8.910 \cdot 10^{-3}$ | 0.0059  |                         |

452  
453  
454

**Table S3. Estimation of CO<sub>2</sub> effect on  $\alpha_{\text{alkenone}}$  in our cultures and in previously published culture, SPOM, and sediment data.** Abbreviations: MLR, multiple linear regression; N, number of datapoints; SE, standard error; SST, sea surface temperature; SSS, sea surface salinity.

| Study                                                      | CO <sub>2</sub> (aq) calculation                                                                                                       | Data selection                                                                                                                                                                                                                                       | Slope                                               | SE                                                                | N                                      |
|------------------------------------------------------------|----------------------------------------------------------------------------------------------------------------------------------------|------------------------------------------------------------------------------------------------------------------------------------------------------------------------------------------------------------------------------------------------------|-----------------------------------------------------|-------------------------------------------------------------------|----------------------------------------|
| Our cultures 18°C, 50 $\mu$ E                              | From pH and DIC. CO <sub>2</sub> (aq) is the average of previous 3 days of cultivation.                                                |                                                                                                                                                                                                                                                      | -8.99·10 <sup>-4</sup>                              | 9.89·10 <sup>-5</sup>                                             | <b>18</b>                              |
| Our cultures 18°C, 100 $\mu$ E                             |                                                                                                                                        |                                                                                                                                                                                                                                                      | -4.46·10 <sup>-4</sup>                              | 6.85·10 <sup>-5</sup>                                             | 12                                     |
| Our cultures 18°C, 200 $\mu$ E                             |                                                                                                                                        |                                                                                                                                                                                                                                                      | -5.14·10 <sup>-4</sup>                              | 1.56·10 <sup>-4</sup>                                             | 46                                     |
| Our cultures all conditions (MLR)                          |                                                                                                                                        |                                                                                                                                                                                                                                                      | -6.02·10 <sup>-4</sup>                              | 1.19·10 <sup>-4</sup>                                             | 29                                     |
| Cultures <i>E. huxleyi</i> RCC2050 (Weiss et al. 2019) (9) | From initial and final pH and total alkalinity. Plotted CO <sub>2</sub> (aq) is average of initial and final.                          | Excluded cultures with greater than 5 $\mu$ M variation in CO <sub>2</sub> (aq) between initial and final. Experiment 6 excluded due to much smaller alkalinity drawdown (<200 $\mu$ M) compared to Exp. 1-5 suggests differences in culture growth. | Without Exp.6:<br>-0.0126<br>With exp. 6<br>-0.0017 | Without Exp.6:<br>2.65·10 <sup>-3</sup><br>With Exp. 6:<br>0.0019 | Without Exp.6: 11<br>With Exp.6:<br>12 |
| SPOM (Gould et al. 2019) (12)                              | Assuming modern 400 ppm and air-sea equilibrium for the salinity and temperature.                                                      |                                                                                                                                                                                                                                                      | -0.00471                                            | 0.00115                                                           | 69                                     |
| Core-tops (Weiss et al. 2019 GCA) (13)                     | Assuming pre-industrial 280 ppm and air-sea equilibrium for the salinity and temperature.                                              | Included only samples from regions of alkenone production dominated by <i>E. huxleyi</i> and <i>Gephyrocapsa spp.</i> (Baltic samples excluded).                                                                                                     | -0.00278                                            | 6.66·10 <sup>-4</sup>                                             | 28                                     |
| Glacial-Interglacial (Weiss et al. 2019 PP) (14)           | With estimations of atmospheric pCO <sub>2</sub> from ice core (19) and assuming air-sea equilibrium with alkenone SST and modern SSS. |                                                                                                                                                                                                                                                      | -0.0029                                             | 6.20·10 <sup>-4</sup>                                             | 64                                     |

455

456 **Table S4. Summary of metabolic fluxes constraining alkenone  $^2\text{H}/^1\text{H}$  ratio.** In this table,  $F_{\text{nH}}$  is the flux for the molecules with  $^1\text{H}$  and  $F_{\text{nD}}$ , for  $^2\text{H}$  (D).

457

| Metabolic fluxes                    | Definition                                                                                                                       |
|-------------------------------------|----------------------------------------------------------------------------------------------------------------------------------|
| $F_1, F_{1\text{H}}, F_{1\text{D}}$ | Generation rate of NADPH by ferredoxin:NADP <sup>+</sup> reductase (FNR) with the electrons from light-dependent water splitting |
| $F_2, F_{2\text{H}}, F_{2\text{D}}$ | Exchanging rate of NADPH with water in chloroplast via glutathione reductase (GR)                                                |
| $F_3, F_{3\text{H}}, F_{3\text{D}}$ | Carbon fixing rate in Calvin-Benson-Bassham (CBB) cycle                                                                          |
| $F_4, F_{4\text{H}}, F_{4\text{D}}$ | Lipid synthesis flux controlled by the fatty acid synthetase (FAS) system                                                        |
| $F_5, F_{5\text{H}}, F_{5\text{D}}$ | Water exchanging flux between chloroplast and cytoplasm                                                                          |

458

459



460 **Table S5. Parameters in the model, their definitions, derivation and units.**

461

| Symbol                                 | Definition                                                                               | Derivation                                                                          | Quantity              | Unit                                 |
|----------------------------------------|------------------------------------------------------------------------------------------|-------------------------------------------------------------------------------------|-----------------------|--------------------------------------|
| <b>Measured parameters</b>             |                                                                                          |                                                                                     |                       |                                      |
| r                                      | Cell radius                                                                              | Measured directly                                                                   | Variable              | m                                    |
| h <sub>v</sub>                         | Light intensity                                                                          | Measured directly                                                                   | Variable              | $\mu\text{mol m}^{-2} \text{s}^{-1}$ |
| T                                      | Growth temperature                                                                       | Measured directly                                                                   | Variable              | °C                                   |
| CO <sub>2sw</sub>                      | CO <sub>2</sub> concentration in culture medium                                          | Measured [DIC] and pH                                                               | Variable              | $\mu\text{mol L}^{-1}$               |
| $\alpha_{\text{alkenone-water}}$       | Hydrogen isotope fractionation ( $\alpha$ ) between alkenones and water                  | Measured $\delta^2\text{H}_{\text{alkenone}}$ and $\delta^2\text{H}_{\text{water}}$ | Variable              | ratio                                |
| <b>Parameters from literature</b>      |                                                                                          |                                                                                     |                       |                                      |
| k <sub>ccm</sub>                       | CCM factor (ratio of CO <sub>2</sub> concentration in chloroplast and seawater)          | CO <sub>2x</sub> /CO <sub>2sw</sub>                                                 | 1.5                   | ratio                                |
| k <sub>cat,Rubisco</sub>               | Turnover rate of rubisco                                                                 | From Cummins et al. (2018) (20)                                                     | Eq. 17 (2.67 at 25°C) | s <sup>-1</sup>                      |
| Pool <sub>N</sub>                      | NADPH and NADP <sup>+</sup> concentrations                                               | From Tanaka et al. (2021) (21)                                                      | 1×10 <sup>-5</sup>    | mol m <sup>-3</sup>                  |
| $\rho_{\text{RubisCO}}$                | Rubisco density                                                                          | From Zhang et al. (2021) (22)                                                       | 1.3×10 <sup>-17</sup> | m <sup>-3</sup>                      |
| T <sub>opt</sub>                       | Optimal temperature of <i>G. oceanica</i>                                                | Inferred from Buitenhuis et al. (2008) (7)                                          | 30                    | °C                                   |
| K <sub>M1,Light</sub>                  | Half saturation constant of light in NADPH generation (F <sub>1</sub> )                  | Inferred from Krumhardt et al. (2017) (23)                                          | 200                   | $\mu\text{mol m}^{-2} \text{s}^{-1}$ |
| K <sub>M3,CO2</sub>                    | Half saturation constant of CO <sub>2</sub> in CBB cycle (F <sub>1</sub> )               | From Heurreux et al. (2017) (24)                                                    | 18                    | $\mu\text{mol L}^{-1}$               |
| $\alpha_{W-N,x}$                       | $\alpha$ between NADPH and water during NADPH synthesis in chloroplast                   | Inferred from Sachs et al. (2016) (25)                                              | 0.3                   | ratio                                |
| $\alpha_{W-N,c}$                       | $\alpha$ between NADPH and water during NADPH synthesis in cytoplasm                     | Inferred from Sachs et al. (2016) (25)                                              | 0.6                   | ratio                                |
| $\alpha_{W-N,2}$ ,<br>$\alpha_{N-W,2}$ | $\alpha$ between NADPH and water during exchange ( $\alpha_{W-N,2} = 1/\alpha_{N-W,2}$ ) | Inferred from Sachs et al. (2016) (25)                                              | 1.0                   | ratio                                |
| $\alpha_{N-C,3}$                       | $\alpha$ between NADPH and C3 during Calvin-Benson cycle                                 | Inferred from Sachs et al. (2016) (25)                                              | 1.0                   | ratio                                |
| $\alpha_{N-L,4}$                       | $\alpha$ between NADPH and lipid during lipid synthesis                                  | Inferred from Sachs et al. (2016) (25)                                              | 1.0                   | ratio                                |
| $\alpha_{W-L,4}$                       | $\alpha$ between water and lipid during lipid synthesis                                  | Inferred from Sachs et al. (2016) (25)                                              | 1.0                   | ratio                                |
| R <sub>N-CBB</sub>                     | Ratio of NADPH consumption rate and CBB rate                                             | Inferred from Sharkey (2021) (26)                                                   | 1.0                   | ratio                                |
| R <sub>N-C16</sub>                     | Ratio of NADPH consumption rate and lipid synthesis rate                                 | Inferred from FAS (Baan et al. 2023) (27)                                           | 2.0                   | ratio                                |

|                                                                          |                                                                                                                                                                            |                                                                                               |                                             |       |
|--------------------------------------------------------------------------|----------------------------------------------------------------------------------------------------------------------------------------------------------------------------|-----------------------------------------------------------------------------------------------|---------------------------------------------|-------|
| R <sub>W-CBB</sub>                                                       | Ratio of water consumption rate and CBB rate                                                                                                                               | Fixing 1 mol carbon in CBB, 2 mol hydrogen will be added and 2/3 of them are from water.      | 4/3                                         | ratio |
| R <sub>W-C16</sub>                                                       | Ratio of water consumption rate and lipid synthesis rate                                                                                                                   | Extending 1 mol carbon in lipid, 2 mol hydrogen will be added and 25% of them are from water. | 0.5                                         | ratio |
| R <sub>C16-CBB</sub>                                                     | Ratio of lipid synthesis rate and CBB rate                                                                                                                                 | Inferred from lipid dry weight in cell from Aveiro et al. (2020) (28)                         | 0.17                                        | ratio |
| P <sub>C3,Wx</sub> ,<br>P <sub>C3,Nx</sub>                               | Hydrogen contribution of chloroplast water (W <sub>x</sub> ), chloroplast NADPH (N <sub>x</sub> ) to C <sub>3</sub>                                                        | Inferred from Baan et al. (2023) (27)                                                         | 66.7,<br>33.3                               | %     |
| P <sub>C16,Wx</sub> ,<br>P <sub>C16,Nx</sub> ,<br>P <sub>C16,C3</sub>    | Hydrogen contribution of chloroplast water (W <sub>x</sub> ), chloroplast NADPH (N <sub>x</sub> ) and C <sub>3</sub> to lipids (C <sub>16</sub> )                          | Inferred from Baan et al. (2023) (27)                                                         | 25,<br>25,<br>50                            | %     |
| P <sub>C37,Wc</sub> ,<br>P <sub>C37,Nc</sub> ,<br>P <sub>C37,lipid</sub> | Hydrogen contribution of cytoplasm water (W <sub>c</sub> ), cytoplasm NADPH (N <sub>c</sub> ) and lipid (C <sub>16</sub> -C <sub>18</sub> ) to alkenone (C <sub>37</sub> ) | Inferred from Baan et al. (2023) and Rontani et al. (2006) (27) (27, 29)                      | 12.5,<br>12.5,<br>75                        | %     |
| <b>Fitted parameters</b>                                                 |                                                                                                                                                                            |                                                                                               |                                             |       |
| k <sub>vmax,1</sub>                                                      | Ratio of V <sub>max,1</sub> and V <sub>max,CBB</sub> (at optimal temperature)                                                                                              | Fitted,<br>V <sub>max,1</sub> = k <sub>vmax,1</sub> × V <sub>max,CBB</sub>                    | 3.1696                                      | ratio |
| k <sub>vmax,2</sub>                                                      | Ratio of V <sub>max,exchange</sub> and V <sub>max,CBB</sub> (at opt temperature)                                                                                           | Fitted,<br>V <sub>max,2</sub> = k <sub>vmax,2</sub> × V <sub>max,CBB</sub>                    | 0.9287                                      | ratio |
| k <sub>T</sub>                                                           | Temperature constant for k <sub>cat</sub>                                                                                                                                  | Fitted                                                                                        | -2.4361                                     | ratio |
| K <sub>M1,NADP+</sub>                                                    | Half saturation constant of NADP+ in NADPH generation (F <sub>1</sub> )                                                                                                    | Inferred                                                                                      | 1×Pool <sub>N</sub>                         | mol   |
| K <sub>M2,NADPH</sub>                                                    | Half saturation constant of NADPH in NADPH-water exchange (F <sub>2</sub> )                                                                                                | Inferred                                                                                      | 1×Pool <sub>N</sub>                         | mol   |
| K <sub>M3,NADPH</sub>                                                    | Half saturation constant of NADPH in CBB (Reaction 3)                                                                                                                      | Inferred                                                                                      | 0.2×Pool <sub>N</sub>                       | mol   |
| τ <sub>w,x</sub>                                                         | Water residence time in chloroplast                                                                                                                                        | Inferred, minor role in hydrogen isotope ratios                                               | 1×10 <sup>-5</sup> ~<br>1×10 <sup>-1*</sup> | s     |

462

\*The optimization of parameters was carried out with τ<sub>w,x</sub> = 0.1 s.

463 **Dataset S1. Culture data.**

464 Abbreviations: Alk, alkenone;  $\alpha^{2}\text{H}$ , alpha, hydrogen isotope fractionation between lipids and water; FA,  
465 fatty acid; DIC, dissolved inorganic carbon; POC, particulate organic carbon;  $\mu$ , growth rate; PIC, particulate  
466 inorganic carbon; C:N, carbon/nitrogen ratio; MUFA/SFA, monounsaturated to saturated fatty acids ratio.  
467

468 **SI References**

- 469 1. M. D. Keller, R. C. Selvin, W. Claus, R. R. L. Guillard, Media for the culture of oceanic  
470 ultraphytoplankton. *Journal of Phycology* **23**, 633–638 (1987).
- 471 2. D. R. Kester, I. W. Duedall, D. N. Connors, R. M. Pytkowicz, Preparation of Artificial Seawater.  
472 *Limnology and Oceanography* **12**, 176–179 (1967).
- 473 3. D. Pierrot, E. Lewis, D. W. R. Wallace, MS Excel program developed for CO<sub>2</sub> system calculations  
474 (CO<sub>2</sub>sys\_v2.3.xls). Carbon Dioxide Information Analysis Center (CDIAC), Oak Ridge National  
475 Laboratory, U.S. Department of Energy, Oak Ridge, TN. (2006).  
476 [https://doi.org/10.3334/CDIAC/otg.CO2SYS\\_XLS\\_CDIAC105a](https://doi.org/10.3334/CDIAC/otg.CO2SYS_XLS_CDIAC105a). Deposited 2006.
- 477 4. H. K. Lichtenthaler, [34] Chlorophylls and carotenoids: Pigments of photosynthetic biomembranes.  
478 *Methods in Enzymology* **148**, 350–382 (1987).
- 479 5. B. Légeret, *et al.*, Lipidomic and transcriptomic analyses of *Chlamydomonas reinhardtii* under heat  
480 stress unveil a direct route for the conversion of membrane lipids into storage lipids. *Plant, Cell &*  
481 *Environment* **39**, 834–847 (2016).
- 482 6. S. J. Müller-Schüssele, *et al.*, Chloroplasts require glutathione reductase to balance reactive oxygen  
483 species and maintain efficient photosynthesis. *The Plant Journal* **103**, 1140–1154 (2020).
- 484 7. E. T. Buitenhuis, T. Pangerc, D. J. Franklin, C. Le Quéré, G. Malin, Growth rates of six coccolithophorid  
485 strains as a function of temperature. *Limnology and Oceanography* **53**, 1181–1185 (2008).
- 486 8. H. L. O. McClelland, J. Bruggeman, M. Hermoso, R. E. M. Rickaby, The origin of carbon isotope vital  
487 effects in coccolith calcite. *Nature Communications* **8**, 14511 (2017).
- 488 9. G. M. Weiss, *et al.*, Hydrogen isotope fractionation response to salinity and alkalinity in a calcifying  
489 strain of *Emiliana huxleyi*. *Organic Geochemistry* **134**, 62–65 (2019).
- 490 10. S. Schouten, *et al.*, The effect of temperature, salinity and growth rate on the stable hydrogen isotopic  
491 composition of long chain alkenones produced by *Emiliana huxleyi* and *Gephyrocapsa oceanica*.  
492 *Biogeosciences* **3**, 113–119 (2006).
- 493 11. M. D. Wolhowe, F. G. Prah, I. Probert, M. Maldonado, Growth phase dependent hydrogen isotopic  
494 fractionation in alkenone-producing haptophytes. *Biogeosciences* **6**, 1681–1694 (2009).
- 495 12. J. Gould, M. Kienast, M. Dowd, E. Schefuß, An open-ocean assessment of alkenone  $\delta\text{D}$  as a paleo-  
496 salinity proxy. *Geochimica et Cosmochimica Acta* **246**, 478–497 (2019).
- 497 13. G. M. Weiss, S. Schouten, J. S. Sinninghe Damsté, M. T. J. van der Meer, Constraining the application  
498 of hydrogen isotopic composition of alkenones as a salinity proxy using marine surface sediments.  
499 *Geochimica et Cosmochimica Acta* **250**, 34–48 (2019).
- 500 14. G. M. Weiss, *et al.*, Paleosensitivity of Hydrogen Isotope Ratios of Long-Chain Alkenones to Salinity  
501 Changes at the Chile Margin. *Paleoceanography and Paleoclimatology* **34**, 978–989 (2019).
- 502 15. J. P. Sachs, O. E. Kawka, The influence of growth rate on  $^2\text{H}/^1\text{H}$  fractionation in continuous cultures of  
503 the coccolithophorid *Emiliana huxleyi* and the diatom *Thalassiosira pseudonana*. *PLOS ONE* **10**,  
504 e0141643 (2015).
- 505 16. M. D. Wolhowe, F. G. Prah, G. Langer, A. M. Oviedo, P. Ziveri, Alkenone  $\delta\text{D}$  as an ecological indicator:  
506 A culture and field study of physiologically-controlled chemical and hydrogen-isotopic variation in C37  
507 alkenones. *Geochimica et Cosmochimica Acta* **162**, 166–182 (2015).
- 508 17. G. M. Weiss, E. Y. Pfannerstill, S. Schouten, J. S. Sinninghe Damsté, M. T. J. van der Meer, Effects of  
509 alkalinity and salinity at low and high light intensity on hydrogen isotope fractionation of long-chain  
510 alkenones produced by *Emiliana huxleyi*. *Biogeosciences* **14**, 5693–5704 (2017).
- 511 18. M. T. J. van der Meer, *et al.*, Large effect of irradiance on hydrogen isotope fractionation of alkenones  
512 in *Emiliana huxleyi*. *Geochimica et Cosmochimica Acta* **160**, 16–24 (2015).
- 513 19. P. Köhler, C. Nehrbass-Ahles, J. Schmitt, T. F. Stocker, H. Fischer, A 156 kyr smoothed history of the  
514 atmospheric greenhouse gases CO<sub>2</sub>, CH<sub>4</sub>, and N<sub>2</sub>O and their radiative forcing. *Earth System Science*  
515 *Data* **9**, 363–387 (2017).

- 516 20. P. L. Cummins, B. Kannappan, J. E. Gready, Directions for Optimization of Photosynthetic Carbon  
517 Fixation: RuBisCO's Efficiency May Not Be So Constrained After All. *Frontiers in Plant Science* **9**  
518 (2018).
- 519 21. K. Tanaka, *et al.*, Quantification of NAD(P)H in cyanobacterial cells by a phenol extraction method.  
520 *Photosynth Res* **148**, 57–66 (2021).
- 521 22. H. Zhang, *et al.*, An isotope label method for empirical detection of carbonic anhydrase in the  
522 calcification pathway of the coccolithophore *Emiliana huxleyi*. *Geochimica et Cosmochimica Acta* **292**,  
523 78–93 (2021).
- 524 23. K. M. Krumhardt, N. S. Lovenduski, M. D. Iglesias-Rodriguez, J. A. Kleypas, Coccolithophore growth  
525 and calcification in a changing ocean. *Progress in Oceanography* **159**, 276–295 (2017).
- 526 24. A. M. C. Heureux, *et al.*, The role of Rubisco kinetics and pyrenoid morphology in shaping the CCM of  
527 haptophyte microalgae. *J Exp Bot* **68**, 3959–3969 (2017).
- 528 25. J. P. Sachs, A. E. Maloney, J. Gregersen, C. Paschall, Effect of salinity on <sup>2</sup>H/<sup>1</sup>H fractionation in lipids  
529 from continuous cultures of the coccolithophorid *Emiliana huxleyi*. *Geochimica et Cosmochimica Acta*  
530 **189**, 96–109 (2016).
- 531 26. T. D. Sharkey, Pentose Phosphate Pathway Reactions in Photosynthesizing Cells. *Cells* **10** (2021).
- 532 27. J. Baan, M. Holloway-Phillips, D. B. Nelson, A. Kahmen, The metabolic sensitivity of hydrogen isotope  
533 fractionation differs between plant compounds. *Phytochemistry* **207**, 113563 (2023).
- 534 28. S. S. Aveiro, *et al.*, The Polar Lipidome of Cultured *Emiliana huxleyi*: A Source of Bioactive Lipids with  
535 Relevance for Biotechnological Applications. *Biomolecules* **10**, 1434 (2020).
- 536 29. J.-F. Rontani, F. G. Prahl, J. K. Volkman, Re-Examination of the Double Bond Positions in Alkenones  
537 and Derivatives: Biosynthetic Implications1. *Journal of Phycology* **42**, 800–813 (2006).
- 538
